# Supplementary material for: Au–polymer hybrid microgels easily prepared by thermo-induced self-crosslinking and in situ reduction
Source: Royal Society of Chemistry journal article supplement (doi:10.1039/c6ra07864h), 2016-01-01
Supplement: c6ra07864h1.pdf [file c6ra07864h1.pdf]

## Au-polymer hybrid microgels easily prepared by thermo-induced self-crosslinking and in situ reduction

Zhen Wu, Xiang Chen, Jiao-Yang Li, Cai-Yuan Pan, Chun-Yan Hong\*

*CAS Key Lab of Soft Matter Chemistry, Department of Polymer Science and Engineering, University of Science and Technology of China, Hefei, 230026 Anhui, P. R. China.*

*E-mail: [hongcy@ustc.edu.cn](mailto:hongcy@ustc.edu.cn)*

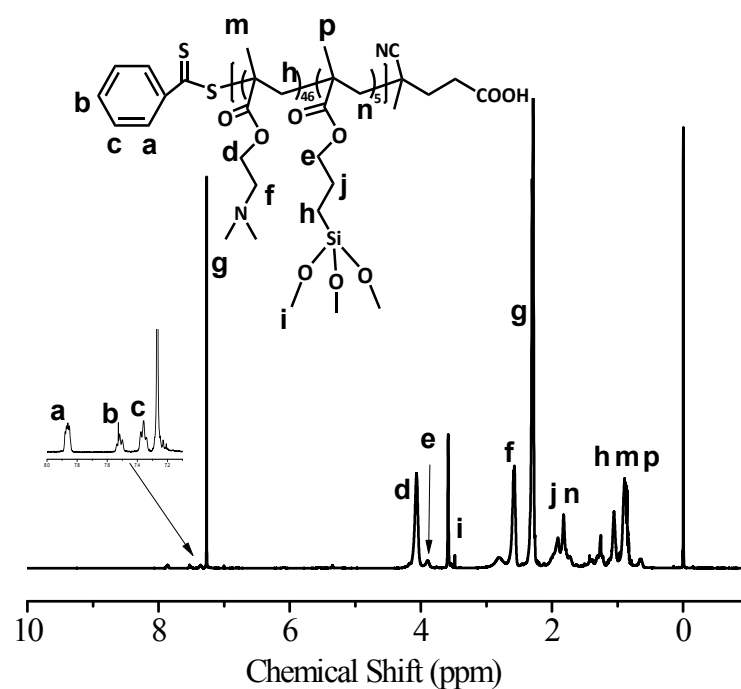

**Fig. S1** <sup>1</sup>H NMR spectrum of P(DMAEMA-co-TMSPMA) in CDCl<sub>3</sub>.

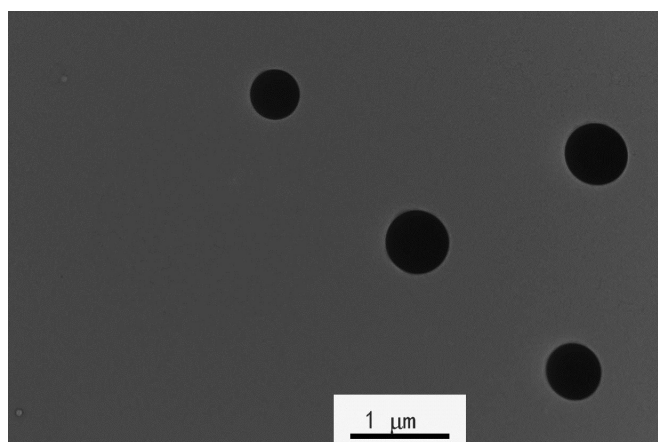

**Fig. S2** TEM image of microgels prepared from P(DMAEMA-co-TMSPMA) solution (2.0 mL, 4.0 mg mL<sup>-1</sup>) after being heated at 70 °C for 40 min.

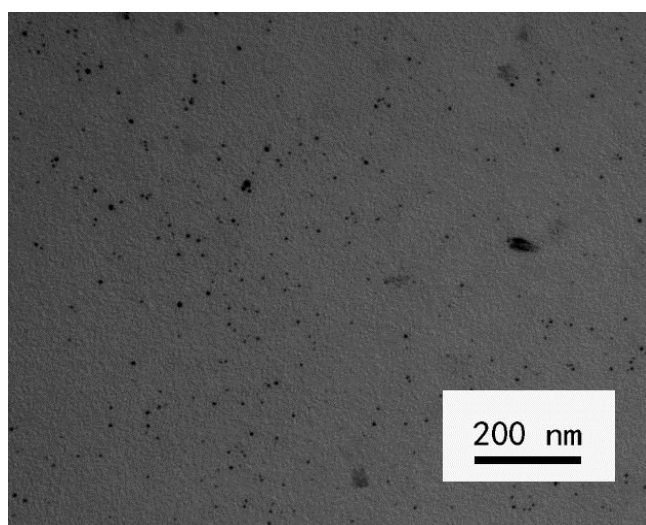

**Fig. S3** TEM image of the mixture of P(DMAEMA-co-TMSPMA) (2.0 mL, 4.0 mg mL<sup>-1</sup>) and HAuCl<sub>4</sub> (16.0 μL, 100 mg mL<sup>-1</sup>) after being heated at 70 °C for 30 min.

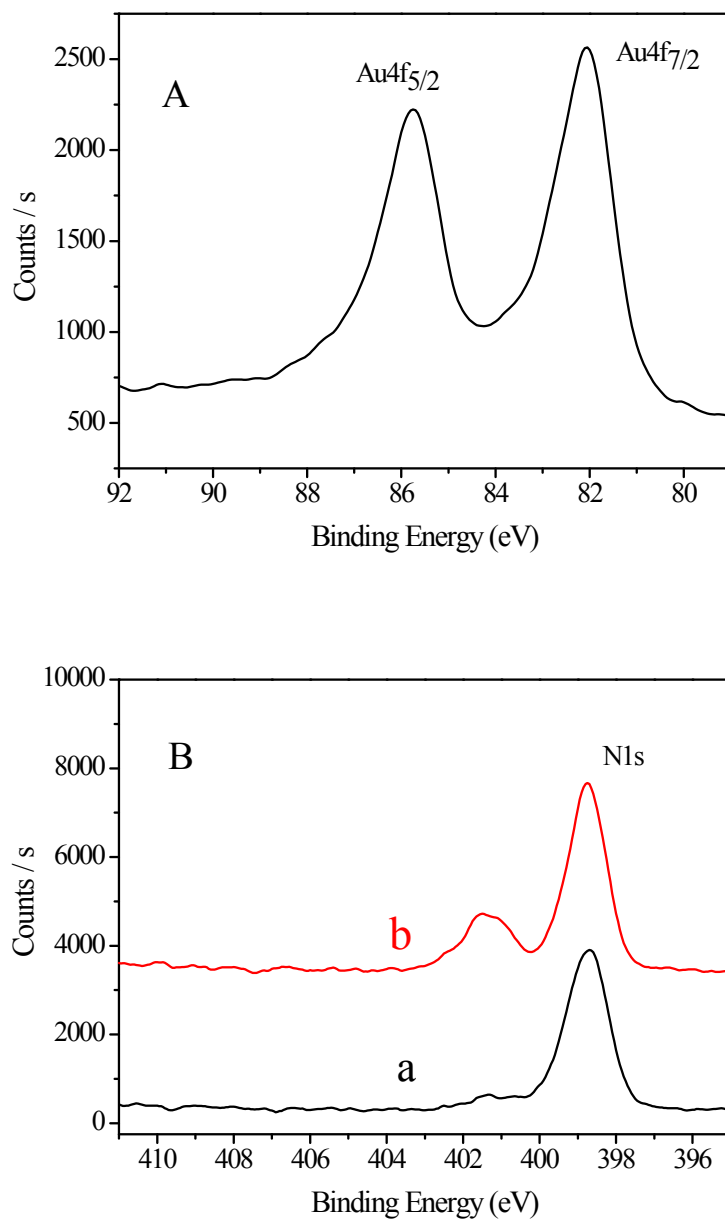

**Fig. S4** (A) XPS spectrum of Au4f for Au-polymer hybrid microgels, (B) XPS spectra of N1s: curve a is the spectrum of polymer microgels, curve b is the spectrum of Au-polymer hybrid microgels.

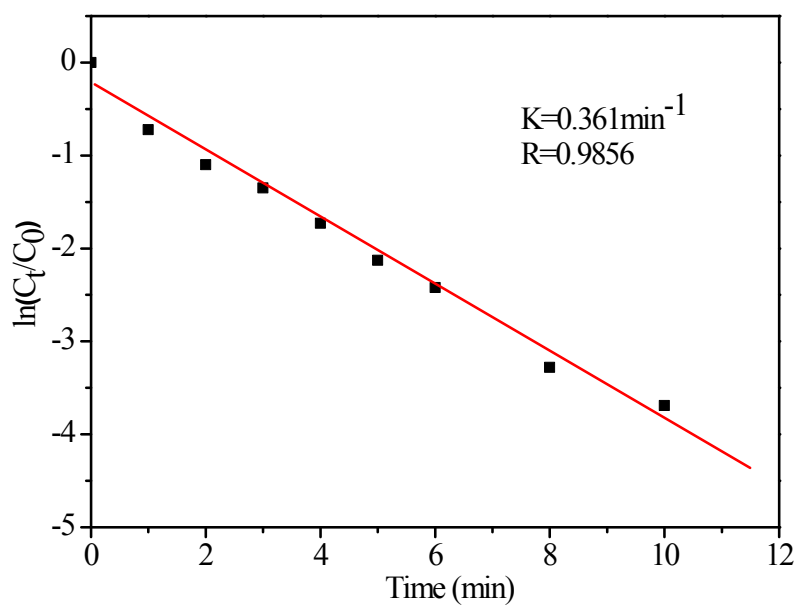

**Fig. S5** Plot of  $\ln(C_t/C_0)$  versus time for Au-polymer hybrid microgels.

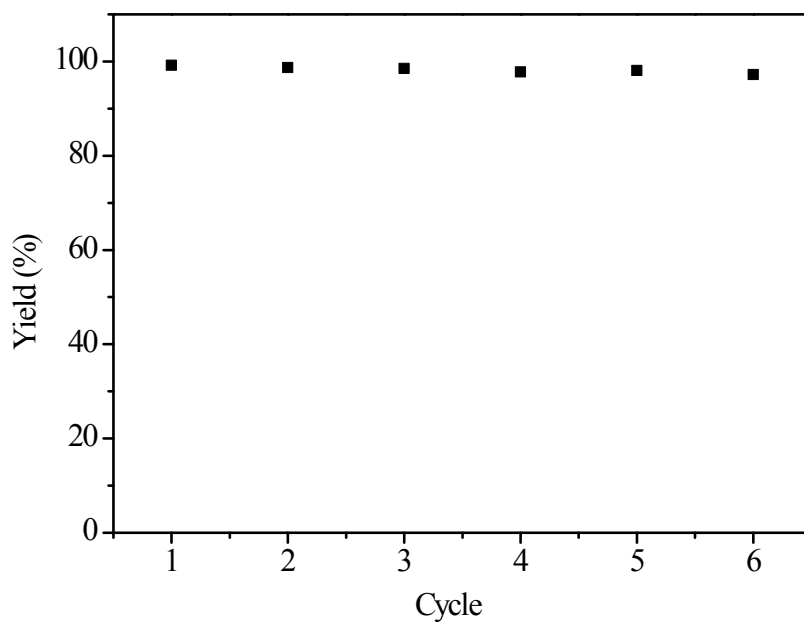

**Fig. S6** The reusability of Au-polymer hybrid microgels as catalyst for the reduction of 4-nitrophenol (4-NP) by NaBH<sub>4</sub>.
